# Supplementary material for: H2O2assisted room temperature oxidation of Ti2C MXene for Li-ion battery anodes
Source: Royal Society of Chemistry journal article supplement (doi:10.1039/c6nr00002a), 2016-01-01
Supplement: c6nr00002a1.pdf [file c6nr00002a1.pdf]

**[Supporting Information]**

**H<sub>2</sub>O<sub>2</sub> Assisted Room Temperature Oxidation of Ti<sub>2</sub>C MXene for Li-ion  
Battery Anodes**

Bilal Ahmed<sup>1</sup>, Dalaver H. Anjum<sup>1</sup>, Mohamed N. Hedhili<sup>1</sup>, Yury Gogotsi<sup>2</sup> and

Husam N. Alshareef<sup>1,\*</sup>

<sup>1</sup>Materials Science and Engineering, King Abdullah University of Science and Technology (KAUST), Thuwal, 23955–6900, Saudi Arabia

<sup>2</sup>Department of Materials Science and Engineering, and A.J. Drexel Nanomaterials Institute, Drexel University, Philadelphia, PA, 19104, USA

\*Corresponding author: [husam.alshareef@kaust.edu.sa](mailto:husam.alshareef@kaust.edu.sa)

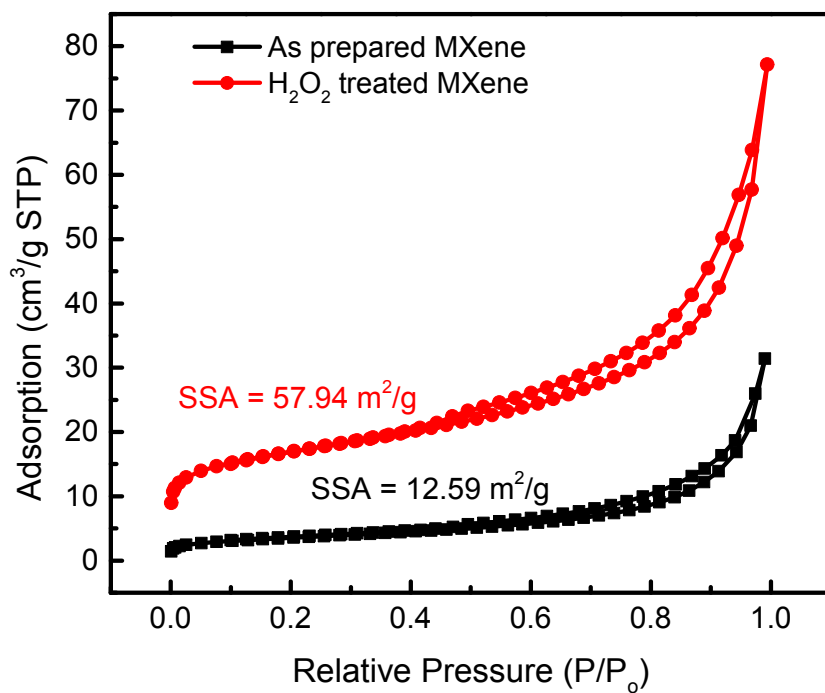

**Figure S1** Nitrogen adsorption–desorption isotherms for as-prepared Ti<sub>2</sub>CT<sub>x</sub> and H<sub>2</sub>O<sub>2</sub> treated MXene (immersion time ≈ 5 minutes)

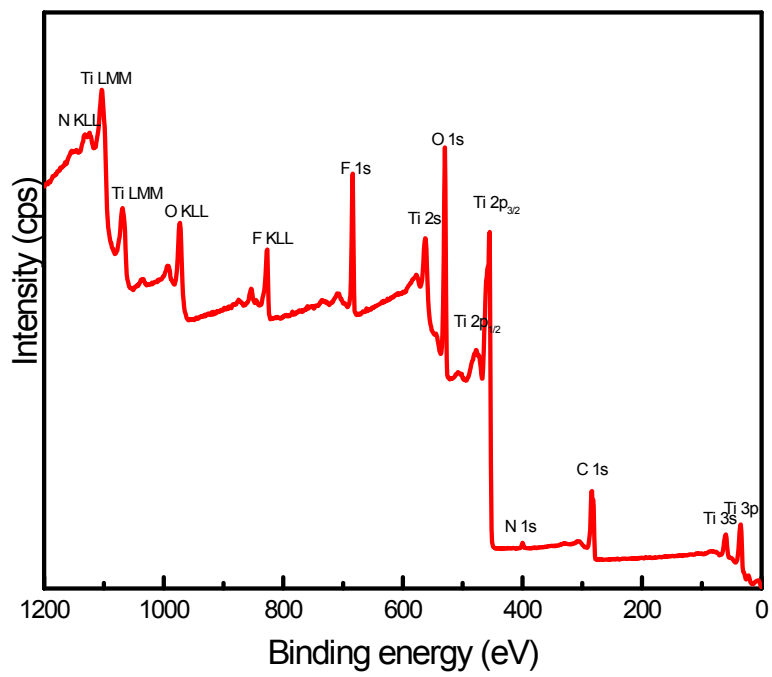

**Figure S2** XPS survey spectrum of as-prepared  $\text{Ti}_2\text{CT}_x$

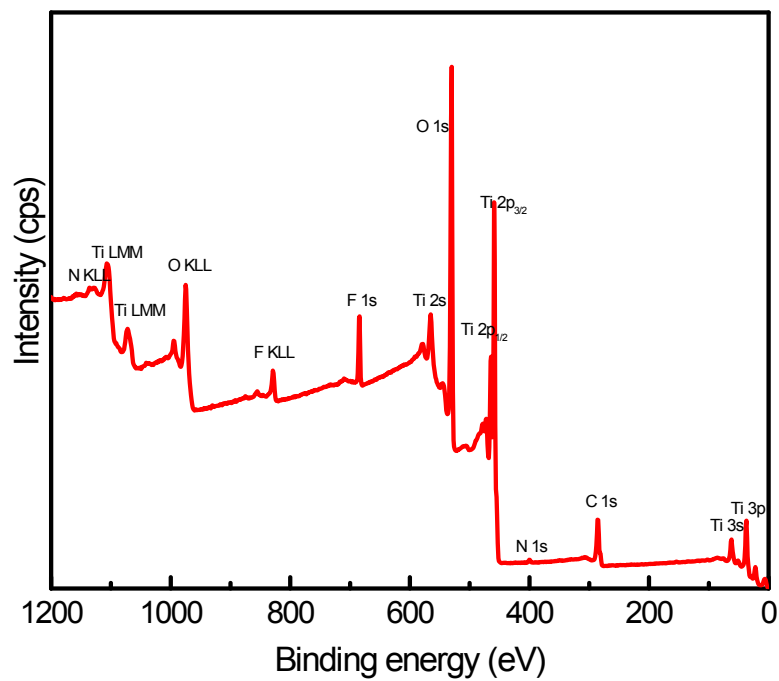

**Figure S3** XPS survey spectrum of  $\text{H}_2\text{O}_2$  treated  $\text{Ti}_2\text{CT}_x$  (immersion time  $\approx$  5 minutes)

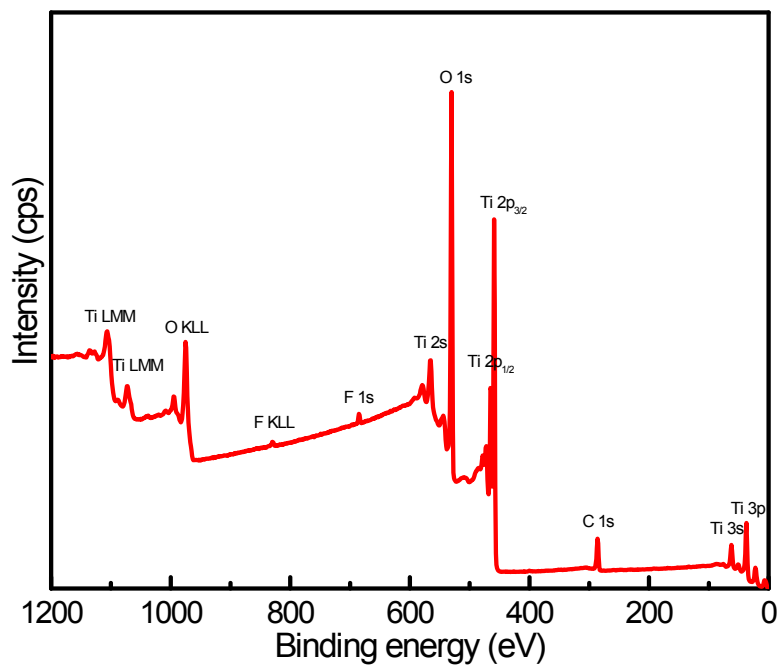

**Figure S4** XPS survey spectrum of H<sub>2</sub>O<sub>2</sub> treated MXene (immersion time  $\approx$  5 hours)

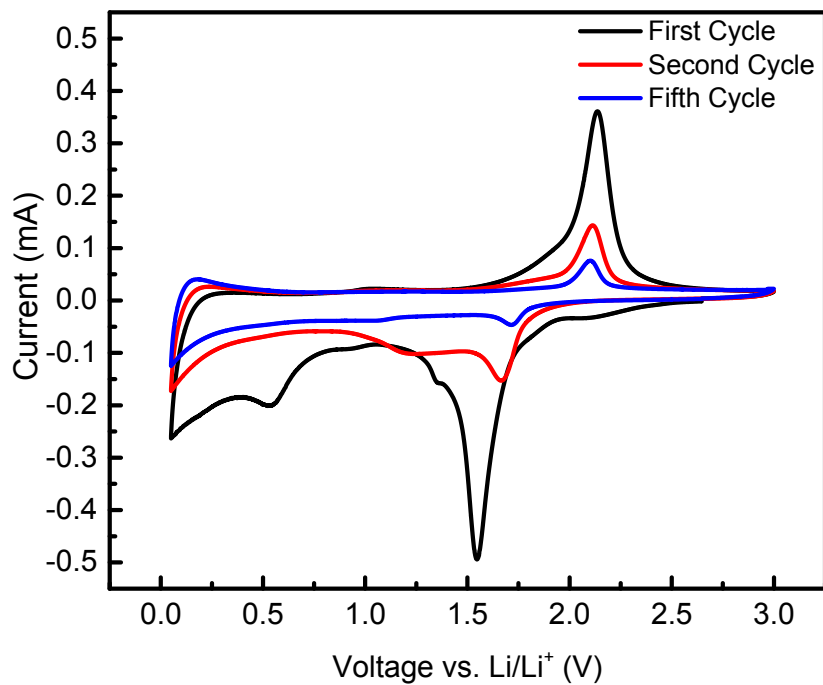

**Figure S5** Cyclic voltammetry curves of H<sub>2</sub>O<sub>2</sub> treated Ti<sub>2</sub>CT<sub>x</sub> (immersion time  $\approx$  5 hours) at the scan rate of 0.2 mV/s
